# Supplementary material for: Nuclear Localised MORE SULPHUR ACCUMULATION1 Epigenetically Regulates Sulphur Homeostasis in Arabidopsis thaliana
Source: PubMed Central journal article supplement (PMC5021336; doi:10.1371/journal.pgen.1006298), 2016-09-13
Supplement: pgen.1006298.s009.pdf [file pgen.1006298.s009.pdf]

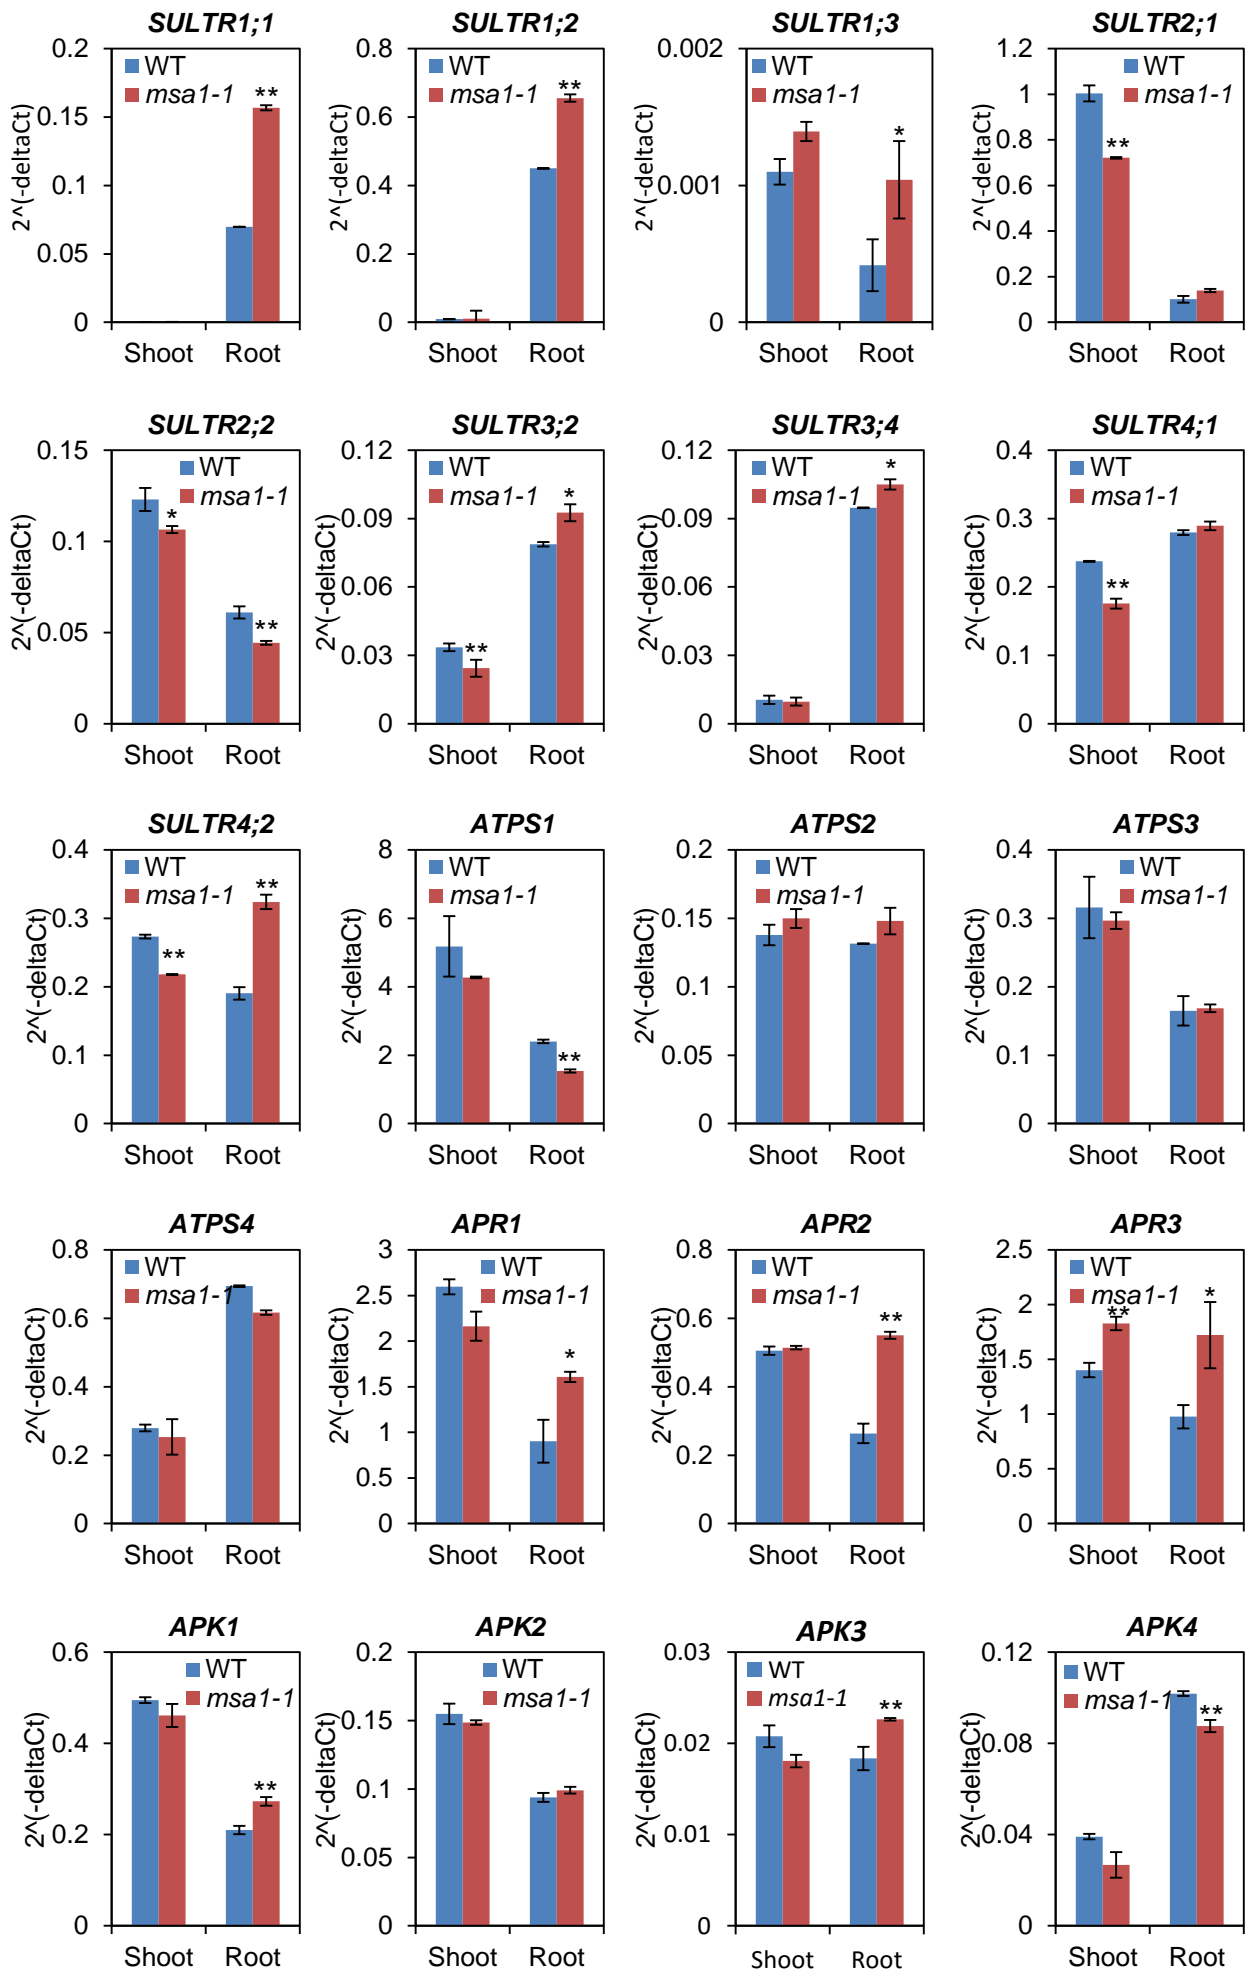

**S9 Fig continued**

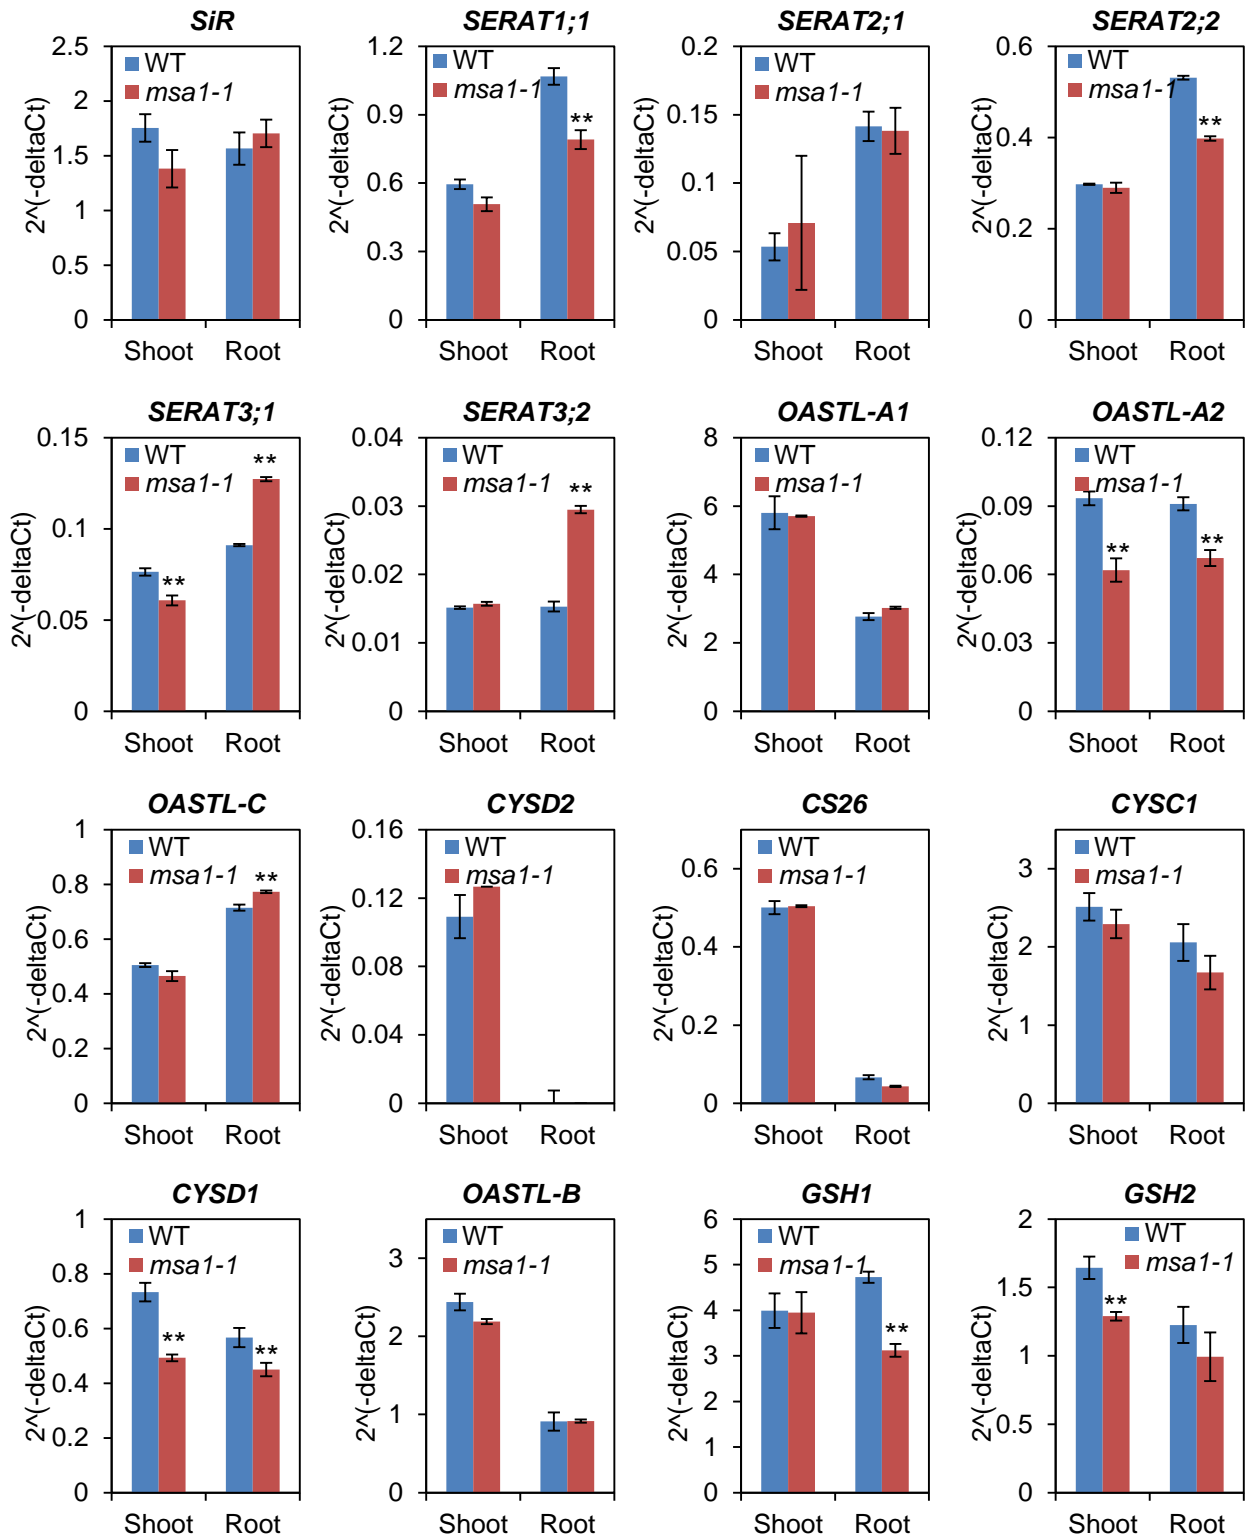

**S9 Fig. Expression of genes involved in sulphate uptake, sulphur metabolism and metabolism of sulphated compounds in the *msa1-1* mutant.** Total RNA was isolated from the shoot and root of WT and *msa1-1* mutant grown in soil for five weeks and the transcript level was determined by quantitative RT-PCR. The expression level was normalized to the internal control gene *UBQ10*, and presented as  $2^{-(\Delta\Delta Ct)}$  with means  $\pm$  SD ( $n = 3$ ). Single and double asterisks indicate values significantly different between WT and *msa1-1* mutant at  $P \leq 0.05$  and  $P \leq 0.01$ , respectively (Student's *t* test).
